# Supplementary material
Source: MDPI journal article supplement (https://www.mdpi.com/2077-0472/11/2/103)
Supplement: s1 [file s1]

# Influence of Quality of Work Life (QoWL) among seasonal farmers workers and workplace commitment

The purpose of this questionnaire is to get your view on safety at your workplace. Your answers will be processed on a computer and will be dealt with confidentially. No individual results will be presented in any way. Although we want you to answer each and every question, you have the right to refrain from answering any one particular question, a group of questions, or the entire questionnaire

## Consent:

I have read the above introduction to the questionnaire and agree to complete the questionnaire under the stated conditions.

## Section A

1. Gender
  - a. Male  b. Female
2. Your age in years
  - a.  $\leq 25$  years  b. 25-44  c. 45- 59  d.  $\geq 60$
3. Do you have caring responsibilities for dependents in the following categories? (select all that apply)
  - a. No  b. Babies/young children (0-5 years)  c. School age children  d. elderly relatives (i.e. parent)
4. Do you have a disability?
  - a. Yes  b. No
5. Approximately how many hours do you work in a typical week?
  - a.  $\leq 20$  hrs./wk.  b. 20. 40 hrs./wk. c. 41-50 hrs./wk.   $\leq 60$  hrs./wk.
6. Approximately how many days have you been off work due to ill health in the last year?
  - a. None  b. 1-5 days  c. 6-10 days d. 11-15 days e.  $\geq 15$  days
7. How are you paid on the job?
  - a. Salaried (month end)  b. Hourly c. other
8. Does your job require you to do repeated lifting, pushing, pulling or bending?
  - a. Yes  b. No
9. Does your job regularly require you to perform repetitive or forceful hand movements or involve awkward postures?
  - a. Yes  b. No

**Section B**

|    | To what extent do you agree with the following?                                                      | Strongly Disagree | Disagree | Neutral | Agree | Strongly agree |
|----|------------------------------------------------------------------------------------------------------|-------------------|----------|---------|-------|----------------|
| 1  | I have a clear set of goals and aims to enable me to do my job                                       |                   |          |         |       |                |
| 2  | I feel able to voice opinions and influence changes in my area of work                               |                   |          |         |       |                |
| 3  | I have the opportunity to use my abilities at work                                                   |                   |          |         |       |                |
| 4  | I feel well at the moment                                                                            |                   |          |         |       |                |
| 5  | My employer provides adequate facilities and flexibility for me to fit work in around my family life |                   |          |         |       |                |
| 6  | My current working hours / patterns suit my personal circumstances                                   |                   |          |         |       |                |
| 7  | I often feel under pressure at work                                                                  |                   |          |         |       |                |
| 8  | When I have done a good job it is acknowledged by my line manager                                    |                   |          |         |       |                |
| 9  | Recently, I have been feeling unhappy and depressed                                                  |                   |          |         |       |                |
| 10 | I am satisfied with my life                                                                          |                   |          |         |       |                |
| 11 | I am encouraged to develop new skills                                                                |                   |          |         |       |                |
| 12 | I am involved in decisions that affect me in my own area of work                                     |                   |          |         |       |                |
| 13 | My employer provides me with what I need to do my job effectively                                    |                   |          |         |       |                |
| 14 | My line manager actively promotes flexible hours/patterns                                            |                   |          |         |       |                |
| 15 | In most ways my life is close to ideal                                                               |                   |          |         |       |                |
| 16 | I work in a safe environment                                                                         |                   |          |         |       |                |
| 17 | Generally things work out well for me                                                                |                   |          |         |       |                |
| 18 | I am satisfied with the career opportunities available for me here                                   |                   |          |         |       |                |
| 19 | I often feel excessive levels of stress at work                                                      |                   |          |         |       |                |
| 20 | I am satisfied with the training I receive in order to perform my present job                        |                   |          |         |       |                |
| 21 | Recently, I have been feeling reasonably happy all things considered                                 |                   |          |         |       |                |
| 22 | The working conditions are satisfactory                                                              |                   |          |         |       |                |
| 23 | I am involved in decisions that directly affect members of the public                                |                   |          |         |       |                |
| 24 | I have unachievable deadlines                                                                        |                   |          |         |       |                |
| 25 | I am able to achieve a healthy balance between my work and home life                                 |                   |          |         |       |                |
| 26 | The organisation communicates safety issues well with its employees                                  |                   |          |         |       |                |
| 27 | I am proud to tell others that I am part of this organisation                                        |                   |          |         |       |                |

|    |                                                                           |  |  |  |  |  |
|----|---------------------------------------------------------------------------|--|--|--|--|--|
| 28 | I would recommend this organisation as a good one to work for             |  |  |  |  |  |
| 29 | I am pressured to work long hours                                         |  |  |  |  |  |
| 30 | I have sufficient opportunities to question managers about change at work |  |  |  |  |  |
| 31 | I am happy with the physical environment where I usually work             |  |  |  |  |  |
| 32 | I am satisfied with the overall quality of my working life                |  |  |  |  |  |

Special thanks to QoWL Ltd.
